# Supplementary material for: Effectiveness of a Smoking Cessation Program during the COVID-19 Pandemic
Source: MDPI journal article supplement (doi:10.3390/healthcare11111536), 2023-05-24
Supplement: s1 [file s1]

## SUPPLEMENTARY MATERIAL

Article title: Effectiveness of a Smoking Cessation Program during the COVID-19 Pandemic

Authors: Aleksandra Kruk, Celina Czerwińska, Justyna Dolna-Michno, Elżbieta Broniatowska and Emanuel Kolanko

Questionnaire S1 Assessment of the smoking status at baseline in participants of the "Take a deep breath" program.

| Question                                                                                 | Answer                                                                                                                                                |
|------------------------------------------------------------------------------------------|-------------------------------------------------------------------------------------------------------------------------------------------------------|
| Q1. How soon after waking up do you smoke your first cigarette                           | Within the first 5 minutes<br>Within the first 6-30 minutes<br>Within the first 31-60 minutes                                                         |
| Q2. Do you find it difficult to refrain from smoking in places where it is not allowed?  | Yes<br>No                                                                                                                                             |
| Q3. How many cigarettes do you smoke on average per day?                                 | 10 a day or less<br>11-20 a day<br>21-30 a day<br>31 a day or more                                                                                    |
| Q4. Can you refrain from smoking even when you are sick and stay in bed most of the day? | Yes<br>No                                                                                                                                             |
| Q5. What type of tobacco products do you use most often?                                 | Cigarettes<br>E-cigarettes<br>Tobacco heating system<br>Water pipe<br>Pipe<br>Cigar<br>Other<br>I do not know / I do not want to answer this question |
| Q6. How often do you smoke?                                                              | Once a day<br>Few times a day<br>Few times a week<br>Occasionally                                                                                     |

Questionnaire S2 Follow-up interview by phone after at least a minimum of 1-year participation in the program

| Area of assessment                                                                                       |                                                                      | Question                                                                                | Answer                                                                                                                                                                                                |
|----------------------------------------------------------------------------------------------------------|----------------------------------------------------------------------|-----------------------------------------------------------------------------------------|-------------------------------------------------------------------------------------------------------------------------------------------------------------------------------------------------------|
| Prevalence of tobacco smoking; key aspects of tobacco surveillance                                       | Current smoking status                                               | Q1. Are you a current smoker?<br>Do you smoke every day, not every day, or not at all?  | Every day<br>Not every day<br>Not at all<br>I do not know / I do not want to answer this question                                                                                                     |
|                                                                                                          | Past smoking status for smokers who currently do not smoke every day | Q2a. In the past, did you smoke cigarettes every day?                                   | Yes<br>No                                                                                                                                                                                             |
|                                                                                                          | Past smoking status                                                  | Q2b. In the past, did you smoke cigarettes every day or not every day?                  | Every day<br>Not every day<br>I do not know / I do not want to answer this question                                                                                                                   |
| Intensity of physical addiction to nicotine, differentiation between biological and behavioral addiction |                                                                      | Q3. How many cigarettes do you smoke on average per day or per week?                    | 10 a day or less<br>11-20 a day<br>21-30 a day<br>31 a day or more<br>10 a week or less<br>11-20 a week<br>21-30 a week<br>31 a week or more<br>I do not know / I do not want to answer this question |
|                                                                                                          |                                                                      | Q4. How soon after waking up do you smoke your first cigarette?                         | Within the first 5 minutes<br>Within the first 6-30 minutes<br>Within the first 31-60 minutes                                                                                                         |
|                                                                                                          |                                                                      | Q5. Do you find it difficult to refrain from smoking in places where it is not allowed? | Yes<br>No                                                                                                                                                                                             |
|                                                                                                          |                                                                      | Q6. Can you refrain from smoking even when you are                                      | Yes<br>No                                                                                                                                                                                             |

|                                            |                                                                                                   |                                                                                                                                                       |
|--------------------------------------------|---------------------------------------------------------------------------------------------------|-------------------------------------------------------------------------------------------------------------------------------------------------------|
|                                            | sick and stay in bed most of the day?                                                             |                                                                                                                                                       |
|                                            | Q7. What type of tobacco products do you use most often?                                          | Cigarettes<br>E-cigarettes<br>Other<br>Tobacco heating system<br>Water pipe<br>Pipe<br>Cigar<br>I do not know / I do not want to answer this question |
| Effectiveness of smoking cessation program | Q8. Since you joined the program, have you had any consultations in the tobacco treatment center? | Yes<br>No<br>I do not know / I do not want to answer this question                                                                                    |
|                                            | Q9. Since you joined the program, how many times have you tried to quit smoking?                  | <i>(provide the number of times)</i>                                                                                                                  |
|                                            | Q10. How long is it since you have quitted smoking?                                               | <i>(provide the number of months)</i>                                                                                                                 |
|                                            | Q11. Have you used pharmacotherapy to help you quit smoking?                                      | Yes<br>No<br>I do not know / I do not want to answer this question                                                                                    |
|                                            | Q12. What type of medicine or nicotine replacement therapy have you used?                         | <i>(provide the name of the product)</i>                                                                                                              |
| Motivation for smoking cessation           | Q13. What made you quit smoking?                                                                  | <i>(provide the reason)</i>                                                                                                                           |
